# Supplementary material for: Fabrication of a 2 inch free standing porous GaN crystal film and application in the growth of relaxed crack-free thick GaN
Source: Royal Society of Chemistry journal article supplement (doi:10.1039/d1ce01032h), 2021-01-01
Supplement: d1ce01032h1.pdf [file d1ce01032h1.pdf]

## Supporting Information

### Fabrication of 2-inch free standing porous GaN crystal film and application in the growth of relaxed crack-free thick GaN

Lei Liu,<sup>a</sup> Ruixian Yu,<sup>a</sup> Guodong Wang,<sup>\*a</sup> Mingsheng Xu,<sup>a</sup> Shouzhi Wang,<sup>a</sup> Hongdi Xiao,<sup>b</sup>  
Xiaobo Hu,<sup>\*a</sup> Lei Zhang<sup>\*a</sup> and Xiangang Xu<sup>a</sup>

<sup>a</sup>State Key laboratory of Crystal Material, Shandong University, Jinan, 250100, PR China

<sup>b</sup>School of Microelectronics, Shandong University, Jinan, 250101, PR China  
E-mail: guodong9631@sdu.edu.cn; xbhu@sdu.edu.cn; leizhang528@sdu.edu.cn

#### Table of contents:

Table S1 Parameter used in the Eqs. (1) and (2) for calculating stress.

Table S2 The average diameter and density of pores on the surface of GaN films under different annealing conditions.

Table S1 Parameter used in the Eqs (1) and (2) for calculating stress<sup>1</sup>

|                                                             | Sapphire | GaN |
|-------------------------------------------------------------|----------|-----|
| Thickness ( $\mu\text{m}$ )                                 | 430      | 5   |
| Thermal expansion coefficient ( $\times 10^{-6}/\text{K}$ ) | 7.5      | 5.6 |
| Young's modulus (GPa)                                       | 352      | 210 |

Table S2 The average diameter and density of pores on the surface of GaN films under different annealing conditions

|              | Average pore diameter (nm) | Average pore density ( $10^8 \text{ cm}^{-2}$ ) |
|--------------|----------------------------|-------------------------------------------------|
| Unprocessing | 0                          | 0                                               |
| 1200°C       | 250                        | 3                                               |
| 1215°C       | 380                        | 4                                               |
| 1230°C       | 570                        | 3.3                                             |

---

---

1245°C

790

1.9

---

---

### Notes and references

- 1 A. D. Williams and T.D. Moustakas, *J. Cryst. Growth*, 2007, **300**,37–41.
